# Supplementary material for: Critical inhaler technique errors in Swedish patients with COPD: a cross-sectional study analysing video-recorded demonstrations
Source: PubMed Central journal article supplement (PMC7873256; doi:10.1038/s41533-021-00218-y), 2021-02-09
Supplement: 41533_2021_218_MOESM1_ESM.pdf [file 41533_2021_218_MOESM1_ESM.pdf]

## Supplementary information

### Critical inhaler technique errors in Swedish patients with COPD – a cross-sectional study analysing video-recorded demonstrations

*Johanna Sulku, Kristina Bröms, Marieann Högman, Christer Janson, Karin Lisspers, Andrei Malinovski, Håkan Melhus, Björn Ställberg, Elisabet I Nielsen*

#### Contents

|                                                                                                                                                                                                                                 |   |
|---------------------------------------------------------------------------------------------------------------------------------------------------------------------------------------------------------------------------------|---|
| Supplementary Table 1. Checklist for the Breezhaler DPI and the Handihaler DPI.....                                                                                                                                             | 2 |
| Supplementary Table 2. Checklist for the Diskus DPI.....                                                                                                                                                                        | 3 |
| Supplementary Table 3. Checklist for the Easyhaler DPI .....                                                                                                                                                                    | 3 |
| Supplementary Table 4. Checklist for the Genuair DPI and the Novolizer DPI .....                                                                                                                                                | 4 |
| Supplementary Table 5. Checklist for the Turbuhaler DPI .....                                                                                                                                                                   | 4 |
| Supplementary Table 6. Checklist for the Respimat SMI .....                                                                                                                                                                     | 5 |
| Supplementary Table 7. Inhaler device model combinations used by the patients (n = 364) included in the assessment of critical errors.....                                                                                      | 6 |
| Supplementary Table 8. Unadjusted odds ratios (ORs) with 95% CIs for association of variables with $\geq 1$ critical error (CE) for at least one inhaler device model in an unadjusted simple logistic regression analysis..... | 7 |

Supplementary Table 1. Checklist for the Breezhaler DPI and the Handihaler DPI

Genuair

Novolizer

|                | Inhaler technique checklist                                                                                                                                                                                                                                                                                                                                                                                                                         | Agree | Dis-agree | Not visible | Notes |
|----------------|-----------------------------------------------------------------------------------------------------------------------------------------------------------------------------------------------------------------------------------------------------------------------------------------------------------------------------------------------------------------------------------------------------------------------------------------------------|-------|-----------|-------------|-------|
| 1 <sup>1</sup> | The patient opens the device.                                                                                                                                                                                                                                                                                                                                                                                                                       |       |           |             |       |
| 2 <sup>1</sup> | The patient opens the mouthpiece, inserts the capsule into the chamber, and closes the mouthpiece. The device is held with the mouthpiece upwards.<br><input type="checkbox"/> Breezhaler: The patient presses both side buttons simultaneously and then releases them.<br><input type="checkbox"/> Handihaler: The patient presses the side button and releases it. The side button(s) is/are pressed only once and not pressed again at any time. |       |           |             |       |
| 3              | The patient exhales distinctly before inhaling the dose.                                                                                                                                                                                                                                                                                                                                                                                            |       |           |             |       |
| 4 <sup>1</sup> | The patient does not at any time exhale into the mouthpiece.                                                                                                                                                                                                                                                                                                                                                                                        |       |           |             |       |
| 5 <sup>1</sup> | The patient places the mouthpiece in their mouth and breathes in through the mouth.                                                                                                                                                                                                                                                                                                                                                                 |       |           |             |       |
| 6 <sup>1</sup> | <input type="checkbox"/> Breezhaler: The patient breathes in slowly, steadily, and deeply, and the spinning sound can be heard.<br><input type="checkbox"/> Handihaler: The patient breathes in slowly and deeply, and the spinning sound can be heard.                                                                                                                                                                                             |       |           |             |       |
| 7              | The patient distinctly holds his/her breath after inhalation.                                                                                                                                                                                                                                                                                                                                                                                       |       |           |             |       |
| 8              | The patient resumes normal breathing after inhaling the dose.                                                                                                                                                                                                                                                                                                                                                                                       |       |           |             |       |
| 9              | The patient removes the empty capsule.                                                                                                                                                                                                                                                                                                                                                                                                              |       |           |             |       |
| 10             | The patient closes the device.                                                                                                                                                                                                                                                                                                                                                                                                                      |       |           |             |       |

<sup>1</sup>a critical error

Supplementary Table 2. Checklist for the Diskus DPI

|                | Inhaler technique checklist                                                                                                                                                                                                 | Agree | Dis-agree | Not visible | Notes |
|----------------|-----------------------------------------------------------------------------------------------------------------------------------------------------------------------------------------------------------------------------|-------|-----------|-------------|-------|
| 1 <sup>1</sup> | The patient opens the device and a click can be heard.                                                                                                                                                                      |       |           |             |       |
| 2 <sup>1</sup> | The patient holds the device with the mouthpiece toward him-/herself and slides the lever only once, until a click can be heard. The patient does not shake or turn the inhaler device upside down after sliding the lever. |       |           |             |       |
| 3              | The patient exhales distinctly before inhaling the dose.                                                                                                                                                                    |       |           |             |       |
| 4 <sup>1</sup> | The patient does not at any time exhale into the mouthpiece.                                                                                                                                                                |       |           |             |       |
| 5 <sup>1</sup> | The patient places the mouthpiece in his/her mouth and breathes in through the mouth.                                                                                                                                       |       |           |             |       |
| 6 <sup>1</sup> | The patients breathes in steadily and deeply.                                                                                                                                                                               |       |           |             |       |
| 7              | The patient distinctly holds his/her breath after inhalation.                                                                                                                                                               |       |           |             |       |
| 8              | The patient resumes normal breathing after inhaling the dose.                                                                                                                                                               |       |           |             |       |
| 9              | The patient closes the device and a click can be heard.                                                                                                                                                                     |       |           |             |       |

<sup>1</sup>a critical error

Supplementary Table 3. Checklist for the Easyhaler DPI

|                | Inhaler technique checklist                                                                                                                                                                                                                                                                                                                                                             | Agree | Dis-agree | Not visible | Notes |
|----------------|-----------------------------------------------------------------------------------------------------------------------------------------------------------------------------------------------------------------------------------------------------------------------------------------------------------------------------------------------------------------------------------------|-------|-----------|-------------|-------|
| 1 <sup>1</sup> | The patient opens the protective cover (if using it) and the device.                                                                                                                                                                                                                                                                                                                    |       |           |             |       |
| 2 <sup>1</sup> | The patient shakes the device forcefully up and down more than 3 times, and holds it in the upright position. The device is not shaken again at any time after this. The patient presses the inhaler between their finger and thumb until a click can be heard, and then lets it click back. The button is pressed only once and the device is held upright after the button is pushed. |       |           |             |       |
| 3              | The patient exhales distinctly before inhaling the dose.                                                                                                                                                                                                                                                                                                                                |       |           |             |       |
| 4 <sup>1</sup> | The patient does not at any time exhale into the mouthpiece.                                                                                                                                                                                                                                                                                                                            |       |           |             |       |
| 5 <sup>1</sup> | The patient places the mouthpiece in his/her mouth and breathes in through the mouth.                                                                                                                                                                                                                                                                                                   |       |           |             |       |
| 6 <sup>1</sup> | The patient breathes in strongly and deeply.                                                                                                                                                                                                                                                                                                                                            |       |           |             |       |
| 7              | The patient distinctly holds his/her breath after inhalation.                                                                                                                                                                                                                                                                                                                           |       |           |             |       |
| 8              | The patient resumes normal breathing after inhaling the dose.                                                                                                                                                                                                                                                                                                                           |       |           |             |       |
| 9              | The patient closes the device and the protective cover (if using it).                                                                                                                                                                                                                                                                                                                   |       |           |             |       |

<sup>1</sup>a critical error

Supplementary Table 4. Checklist for the Genuair DPI and the Novolizer DPI

- Genuair  
 Novolizer

|                | Inhaler technique checklist                                                                                                                                                                                                                               | Agree | Dis-agree | Not visible | Notes |
|----------------|-----------------------------------------------------------------------------------------------------------------------------------------------------------------------------------------------------------------------------------------------------------|-------|-----------|-------------|-------|
| 1 <sup>1</sup> | The patient opens the device.                                                                                                                                                                                                                             |       |           |             |       |
| 2 <sup>1</sup> | The patient holds the inhaler horizontally with the mouthpiece facing him-/herself and the coloured button on top. The patient presses the coloured button and a click can be heard, and then releases the button and does not push it again at any time. |       |           |             |       |
| 3              | The patient exhales distinctly before inhaling the dose.                                                                                                                                                                                                  |       |           |             |       |
| 4 <sup>1</sup> | The patient does not at any time exhale into the mouthpiece.                                                                                                                                                                                              |       |           |             |       |
| 5 <sup>1</sup> | The patient places the mouthpiece in his/her mouth and breathes in through the mouth.                                                                                                                                                                     |       |           |             |       |
| 6 <sup>1</sup> | The patient inhales strongly and deeply, and a click can be heard.                                                                                                                                                                                        |       |           |             |       |
| 7              | The patient distinctly holds his/her breath after inhalation.                                                                                                                                                                                             |       |           |             |       |
| 8              | The patient resumes normal breathing after inhaling the dose.                                                                                                                                                                                             |       |           |             |       |
| 9              | The patient closes the device.                                                                                                                                                                                                                            |       |           |             |       |

<sup>1</sup>a critical error

Supplementary Table 5. Checklist for the Turbuhaler DPI

|                | Inhaler technique checklist                                                                                                                                                                                            | Agree | Dis-agree | Not visible | Notes |
|----------------|------------------------------------------------------------------------------------------------------------------------------------------------------------------------------------------------------------------------|-------|-----------|-------------|-------|
| 1 <sup>1</sup> | The patient opens the device.                                                                                                                                                                                          |       |           |             |       |
| 2 <sup>1</sup> | The patient holds the device upright with the coloured grip at the bottom, turns the coloured grip as far as it will go in one direction, and then turns it back so that a click can be heard. This is only done once. |       |           |             |       |
| 3              | The patient exhales distinctly before inhaling the dose.                                                                                                                                                               |       |           |             |       |
| 4 <sup>1</sup> | The patient does not at any time exhale into the mouthpiece.                                                                                                                                                           |       |           |             |       |
| 5 <sup>1</sup> | The patient places the mouthpiece in his/her mouth and breathes in through the mouth.                                                                                                                                  |       |           |             |       |
| 6 <sup>1</sup> | The patient breathes in deeply and strongly.                                                                                                                                                                           |       |           |             |       |
| 7              | The patient resumes normal breathing after inhaling the dose.                                                                                                                                                          |       |           |             |       |
| 8              | The patient closes the device.                                                                                                                                                                                         |       |           |             |       |

<sup>1</sup>a critical error

Supplementary Table 6. Checklist for the Respimat SMI

|                | Inhaler technique checklist                                                                                                                              | Agree | Dis-agree | Not visible | Notes |
|----------------|----------------------------------------------------------------------------------------------------------------------------------------------------------|-------|-----------|-------------|-------|
| 1 <sup>1</sup> | The patient keeps the cap closed. The patient turns the clear base in the direction of the arrows on the label until a click can be heard (half a turn). |       |           |             |       |
| 2 <sup>1</sup> | The patient opens the device.                                                                                                                            |       |           |             |       |
| 3              | The patient exhales distinctly before inhaling the dose.                                                                                                 |       |           |             |       |
| 4 <sup>1</sup> | The patient places the mouthpiece in his/her mouth, pointing it toward the back of the throat, and breathes in through the mouth.                        |       |           |             |       |
| 5 <sup>1</sup> | The patient takes a slow, deep breath and simultaneously presses the dose-release button, continuing to breathe in slowly for as long as is comfortable. |       |           |             |       |
| 6              | The patient distinctly holds his/her breath after inhalation.                                                                                            |       |           |             |       |
| 7              | The patient resumes normal breathing after inhaling the dose.                                                                                            |       |           |             |       |
| 8              | The patient closes the device.                                                                                                                           |       |           |             |       |

<sup>1</sup>a critical error

Supplementary Table 7. Inhaler device model combinations used by the patients (n = 364) included in the assessment of critical errors.

| Inhaler device model combination                          | n (%)     | Missing recordings (n patients)                     |
|-----------------------------------------------------------|-----------|-----------------------------------------------------|
| One inhaler device model                                  | 91 (25%)  |                                                     |
| Turbuhaler                                                | 33 (36%)  | -                                                   |
| Breezhaler or Handihaler                                  | 22 (24%)  | -                                                   |
| Easyhaler                                                 | 15 (17%)  | -                                                   |
| Genuair or Novolizer                                      | 12 (13%)  | -                                                   |
| Respimat                                                  | 6 (7%)    | -                                                   |
| Diskus (Accuhaler)                                        | 3 (3%)    | -                                                   |
| Combination of two device models                          | 199 (55%) |                                                     |
| Handihaler + Turbuhaler                                   | 90 (45%)  | Handihaler (2), Turbuhaler (2)                      |
| Genuair or Novolizer + Turbuhaler                         | 24 (12%)  | -                                                   |
| Respimat + Turbuhaler                                     | 16 (8%)   | -                                                   |
| Easyhaler + Handihaler                                    | 15 (8%)   | Handihaler (1)                                      |
| Easyhaler + Respimat                                      | 13 (7%)   | Easyhaler (1)                                       |
| Easyhaler + Genuair or Novolizer                          | 9 (5%)    | -                                                   |
| Easyhaler + Turbuhaler                                    | 9 (5%)    | Turbuhaler (1)                                      |
| Diskus (Accuhaler) + Handihaler                           | 7 (4%)    | -                                                   |
| Breezhaler or Handihaler + Genuair or Novolizer           | 6 (3%)    | -                                                   |
| Diskus (Accuhaler) + Respimat                             | 3 (2%)    | -                                                   |
| Diskus (Accuhaler) + Turbuhaler                           | 1 (0.5%)  | -                                                   |
| Diskus (Accuhaler) + Novolizer                            | 1 (0.5%)  | -                                                   |
| Easyhaler + <i>pMDI suspension</i>                        | 1 (0.5%)  | -                                                   |
| Genuair + <i>Spiromax</i>                                 | 1 (0.5%)  | -                                                   |
| Handihaler + <i>Spiromax</i>                              | 1 (0.5%)  | -                                                   |
| Novolizer + Respimat                                      | 1 (0.5%)  | -                                                   |
| <i>Spiromax</i> + Turbuhaler                              | 1 (0.5%)  | -                                                   |
| Combination of three device models                        | 69 (19%)  |                                                     |
| Diskus (Accuhaler) + Handihaler + Turbuhaler              | 17 (25%)  | Diskus (1), Turbuhaler (2)                          |
| Easyhaler + Handihaler + Turbuhaler                       | 11 (16%)  | Easyhaler (1), Turbuhaler (1)                       |
| Diskus (Accuhaler) + Respimat + Turbuhaler                | 4 (6%)    | Diskus (1), Diskus + Turbuhaler (1), Turbuhaler (1) |
| Easyhaler + Genuair or Novolizer + Turbuhaler             | 4 (6%)    | Easyhaler (1), Turbuhaler (1)                       |
| Easyhaler + Respimat + Turbuhaler                         | 4 (6%)    | Easyhaler (1)                                       |
| Handihaler + Turbuhaler + <i>pMDI suspension</i>          | 4 (6%)    | Turbuhaler (1)                                      |
| Handihaler + Turbuhaler + <i>nebuliser</i>                | 3 (4%)    | -                                                   |
| Breezhaler/Handihaler + Turbuhaler + <i>pMDI solution</i> | 2 (3%)    | -                                                   |
| Diskus (Accuhaler) + Genuair + Turbuhaler                 | 2 (3%)    | -                                                   |
| Diskus (Accuhaler) + Handihaler + <i>pMDI suspension</i>  | 2 (3%)    | Diskus (1)                                          |
| Diskus + Turbuhaler + <i>nebuliser</i>                    | 2 (3%)    | -                                                   |
| Easyhaler + Handihaler + Novolizer                        | 2 (3%)    | -                                                   |
| Handihaler + Turbuhaler + <i>pMDI breath-actuated</i>     | 2 (3%)    | -                                                   |
| Diskus (Accuhaler) + Easyhaler + <i>nebuliser</i>         | 1 (1%)    | Diskus (1)                                          |
| Diskus (Accuhaler) + Easyhaler + Respimat                 | 1 (1%)    | -                                                   |
| Diskus (Accuhaler) + <i>Ellipta</i> + Handihaler          | 1 (1%)    | -                                                   |
| Diskus (Accuhaler) + Genuair + <i>pMDI suspension</i>     | 1 (1%)    | -                                                   |
| <i>Ellipta</i> + Genuair + Turbuhaler                     | 1 (1%)    | -                                                   |
| Genuair + <i>Spiromax</i> + Turbuhaler                    | 1 (1%)    | -                                                   |
| Handihaler + <i>pMDI suspension</i> + <i>nebuliser</i>    | 1 (1%)    | -                                                   |
| Handihaler + Novolizer + Turbuhaler                       | 1 (1%)    | -                                                   |
| Handihaler + <i>Spiromax</i> + Turbuhaler                 | 1 (1%)    | -                                                   |
| Respimat + Turbuhaler + <i>nebuliser</i>                  | 1 (1%)    | -                                                   |
| Combination of four device models                         | 5 (1%)    |                                                     |

|                                                                  |         |   |
|------------------------------------------------------------------|---------|---|
| Breezhaler + Easyhaler + <i>pMDI breath-actuated + nebuliser</i> | 1 (20%) | - |
| Diskus (Accuhaler) + Easyhaler + Handihaler + Turbuhaler         | 1 (20%) | - |
| Easyhaler + Handihaler + Turbuhaler + <i>nebuliser</i>           | 1 (20%) | - |
| Easyhaler + Respimat + Turbuhaler + <i>pMDI suspension</i>       | 1 (20%) | - |
| Novolizer + Respimat + <i>Spiromax + nebuliser</i>               | 1 (20%) | - |

Inhaler device models not included in the assessment of critical errors are shown in *italics*.

Supplementary Table 8. Unadjusted odds ratios (ORs) with 95% CIs for association of variables with  $\geq 1$  critical error (CE) for at least one inhaler device model in an unadjusted simple logistic regression analysis

| Variable                            | n All n = 364 | n CEs n = 242 | OR (95% CI)       | P value <sup>1</sup> |
|-------------------------------------|---------------|---------------|-------------------|----------------------|
| Sex                                 |               |               |                   |                      |
| Female                              | 212           | 145           | 1.23 (0.78, 1.90) | 0.36                 |
| Male                                | 152           | 97            | 1                 |                      |
| Age, years                          |               |               |                   |                      |
| < 65                                | 84            | 52            | 1                 |                      |
| 65–75                               | 203           | 135           | 1.22 (0.72, 2.07) | 0.46                 |
| > 75                                | 77            | 55            | 1.54 (0.80, 3.04) | 0.20                 |
| BMI, kg/m <sup>2</sup>              |               |               |                   |                      |
| < 22                                | 48            | 29            | 0.79 (0.42, 1.52) | 0.47                 |
| 22–30                               | 217           | 143           | 1                 |                      |
| $\geq 30$                           | 96            | 67            | 1.20 (0.72, 2.03) | 0.50                 |
| Current smoker                      | 98            | 69            | 1.34 (0.82, 2.25) | 0.26                 |
| Education                           |               |               |                   |                      |
| Elementary school                   | 224           | 148           | 1                 |                      |
| Upper secondary school              | 95            | 64            | 1.06 (0.64, 1.78) | 0.82                 |
| University                          | 44            | 30            | 1.10 (0.56, 2.25) | 0.79                 |
| Lung function                       |               |               |                   |                      |
| FEV <sub>1</sub> $\geq 80\%$        | 24            | 14            | 1                 |                      |
| 50% $\leq$ FEV <sub>1</sub> < 80%   | 198           | 132           | 1.43 (0.59, 3.37) | 0.42                 |
| 30% $\leq$ FEV <sub>1</sub> < 50%   | 105           | 66            | 1.21 (0.48, 2.97) | 0.68                 |
| FEV <sub>1</sub> < 30%              | 37            | 30            | 3.06 (0.98, 10.1) | 0.06                 |
| CAT score $\geq 10$                 | 227           | 158           | 1.44 (0.92, 2.26) | 0.11                 |
| mMRC score $\geq 2$                 | 172           | 117           | 1.14 (0.74, 1.77) | 0.56                 |
| Frequent exacerbations              | 76            | 60            | 2.18 (1.22, 4.10) | 0.01                 |
| Care level                          |               |               |                   |                      |
| Primary care                        | 324           | 208           | 1                 | 0.01                 |
| Secondary care                      | 40            | 34            | 3.16 (1.38, 8.56) |                      |
| Planned visits to physician         | 150           | 108           | 1.56 (1.00, 2.46) | 0.05                 |
| Planned visits to asthma/COPD nurse | 255           | 168           | 0.94 (0.58, 1.51) | 0.80                 |
| Number of device models used        |               |               |                   |                      |
| 1 device model                      | 91            | 39            | 1                 |                      |
| 2 device models                     | 199           | 139           | 3.09 (1.85, 5.19) | < 0.0001             |
| $\geq 3$ device models              | 74            | 64            | 8.53 (4.03, 19.6) | < 0.0001             |

Data presented as number (%) of patients, BMI body mass index, CAT COPD assessment test, COPD chronic obstructive pulmonary disease, CI confidence interval, FEV<sub>1</sub> forced expiratory volume in 1 second, Frequent exacerbations  $\geq 2$  exacerbations treated in primary care or at emergency department and/or  $\geq 1$  hospital admissions during the previous year due to worsening in COPD, mMRC Modified Medical Research Council Dyspnea Scale.

<sup>1</sup>Comparison of variables between the subgroups were tested with Pearson's  $\chi^2$  test for categorical variables and with unpaired t-test for continuous variables.
